# Supplementary material for: A Metal Organic Framework-Based Light Scattering ELISA for the Detection of Staphylococcal Enterotoxin B
Source: MDPI journal article supplement (doi:10.3390/chemosensors11080453), 2023-08-13
Supplement: s1 [file s1]

Article

# A Metal Organic Framework-Based Light Scattering ELISA for the Detection of Staphylococcal Enterotoxin B

Kai Mao <sup>1,†</sup>, Lili Tian <sup>1,†</sup>, Yujie Luo <sup>1</sup>, Qian Li <sup>2</sup>, Xi Chen <sup>1</sup>, Lei Zhan <sup>2</sup>, Yuanfang Li <sup>1</sup>, Chengzhi Huang <sup>2</sup> and Shujun Zhen <sup>1,\*</sup>

<sup>1</sup> Key Laboratory of Luminescence Analysis and Molecular Sensing (Southwest University), Ministry of Education, College of Chemistry and Chemical Engineering, Southwest University, Chongqing 400715, China; mk1534@email.swu.edu.cn (K.M.); tianlili123@email.swu.edu.cn (L.T.); lyj0712@email.swu.edu.cn (Yujie Luo); cx961019@email.swu.edu.cn (X.C.); liyf@swu.edu.cn (Yuanfang Li)

<sup>2</sup> Key Laboratory of Luminescent and Real-Time Analytical Chemistry (Southwest University), Chongqing Science and Technology Bureau, College of Pharmaceutical Sciences, Southwest University, Chongqing 400715, China; lq671225@email.swu.edu.cn (Q.L.); zhanlei6@swu.edu.cn (L.Z.); chengzhi@swu.edu.cn (C.H.)

\* Correspondence: zsj@swu.edu.cn

† These authors contributed equally to this work.

## 1. The reaction between ZIF-8 and H<sub>2</sub>O<sub>2</sub>

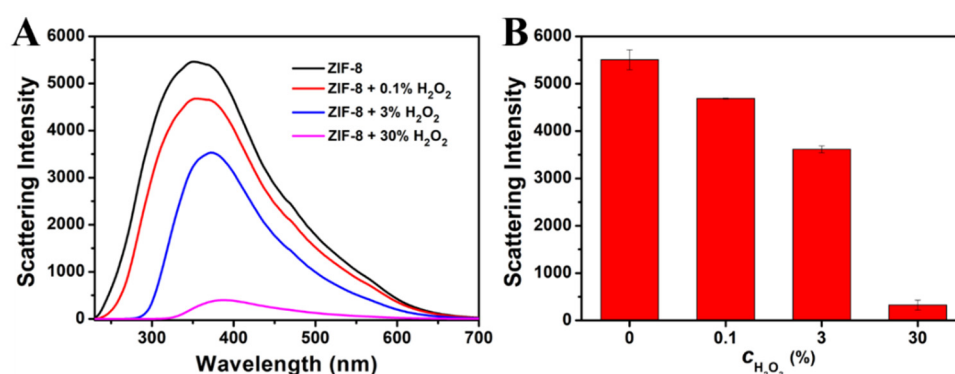

**Fig. S1** The reaction between ZIF-8 and H<sub>2</sub>O<sub>2</sub>. (A) The LS spectrum of ZIF-8 before and after the reaction with H<sub>2</sub>O<sub>2</sub>. (B) The LS intensity of ZIF-8 before and after the reaction with H<sub>2</sub>O<sub>2</sub>. Experimental conditions: the concentration of H<sub>2</sub>O<sub>2</sub> in A and B was 0.1%, 3%, 30%; reaction time, 70 min; ZIF-8, 50 µg/mL. The error bars represent the standard deviation of three replicates.

## 2. Requirements for the number of times the board is washed by interfering substances

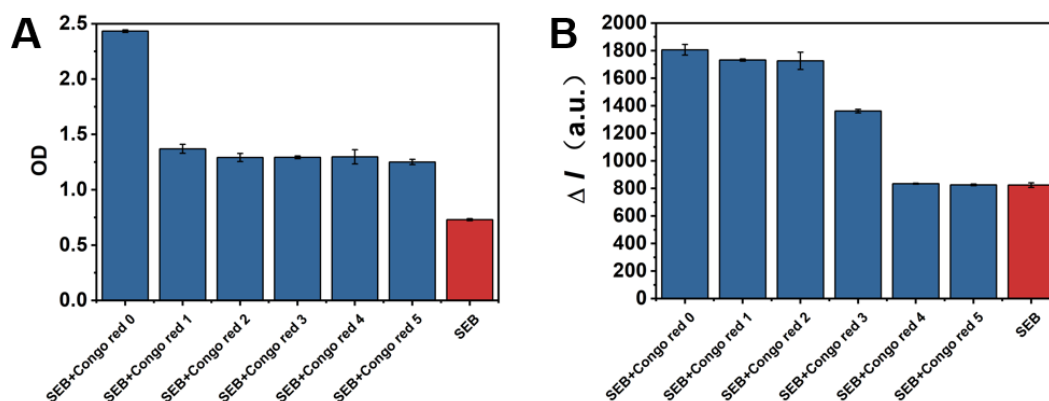

**Fig. S2** SEB ELISA test kits test results (A). The concentration of SEB is 5 pg/mL, the concentration of Congo Red is 50 pg/mL. and the light scattering ELISA test results (B). The concentration of SEB is 250 ng/mL, and the concentration of Congo Red is 2500 ng/mL. Among them, 0 to 5 represent the number of times the board is washed; The error bars represent the standard deviation of three replicates.

### 3. Real sample detection

200 mg skim milk powder dissolved in 1 mL sample diluent. Three different concentrations of SEB were added into the skim milk solutions, orange juice, and fresh milk and then diluted 5 times with sample dilution. The other operations were same with that of SEB detection in standard diluent.
